# Supplementary material for: Two-dimensional phosphorus carbides (β-PC) as highly efficient metal-free electrocatalysts for lithium–sulfur batteries: a first-principles study
Source: Royal Society of Chemistry journal article supplement (doi:10.1039/d4cp01881h), 2024-01-01
Supplement: d4cp01881h1.pdf [file d4cp01881h1.pdf]

## Supporting Information

Two-Dimensional phosphorus carbide (  $\beta$ -PC ) as Highly  
Efficient Metal-free Electrocatalyst for Lithium–Sulfur  
Batteries: A first-principles study

Junru Wang, <sup>a\*,‡</sup> Zhichao Liu, <sup>a‡</sup> Yinchang Zhao, <sup>a</sup> Zhenhong Dai, <sup>a</sup>  
Juan Hua, <sup>a</sup> Mingwen Zhao <sup>b\*</sup>

<sup>a</sup>*Department of Physics, Yantai University, Yantai 264005, Shandong, China*

<sup>b</sup>*School of Physics & State Key Laboratory of Crystal Materials, Shandong University,  
Jinan 250100, Shandong, China*

‡ These authors contribute equally.

\* Corresponding author, E-mail: [wjr@ytu.edu.cn](mailto:wjr@ytu.edu.cn) (Junru Wang); [zmw@sdu.edu.cn](mailto:zmw@sdu.edu.cn)

(Mingwen Zhao)

Table S1 The convergence of energy cutoff of the plane waves for  $\beta_0$ -PC.

| ENCUT (eV) | Energy (eV/atom) |
|------------|------------------|
| 440        | -6.70152         |
| 460        | -6.70123         |
| 480        | -6.70081         |
| 500        | -6.70064         |
| 520        | -6.70060         |
| 540        | -6.70064         |

Table S2 The convergence of energy cutoff of the plane waves for  $\beta_1$ -PC.

| ENCUT (eV) | Energy (eV/atom) |
|------------|------------------|
| 440        | -6.95240         |
| 460        | -6.95218         |
| 480        | -6.95174         |
| 500        | -6.95153         |
| 520        | -6.95147         |
| 540        | -6.95141         |

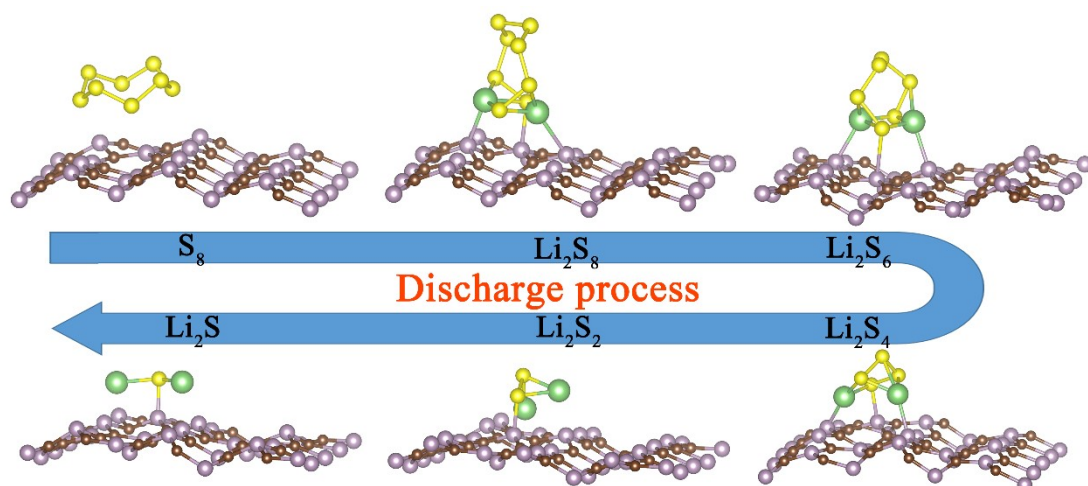

Figure S1 The structural configurations of adsorbed intermediates on the  $\beta_0$ -PC.

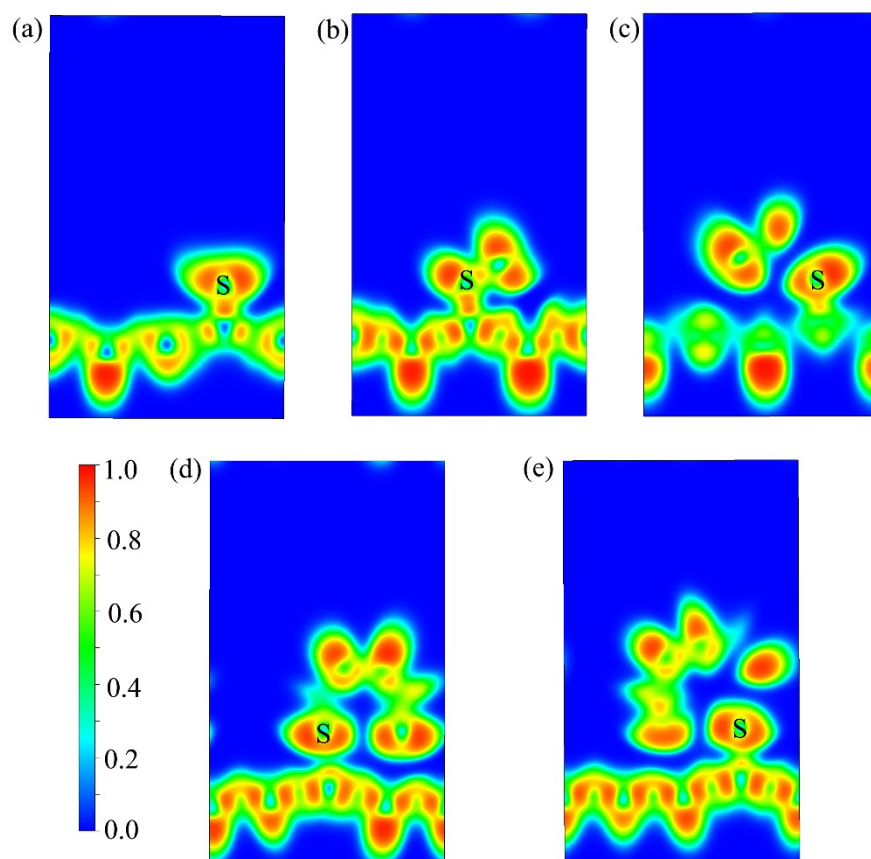

Figure S2 Sliced electron localization function of (a)  $\text{Li}_2\text{S}$ , (b)  $\text{Li}_2\text{S}_2$ , (c)  $\text{Li}_2\text{S}_4$ , (d)  $\text{Li}_2\text{S}_6$ , (e)  $\text{Li}_2\text{S}_8$  adsorbed on  $\beta_0$ -PC surfaces between the S-P and Li-P atoms.

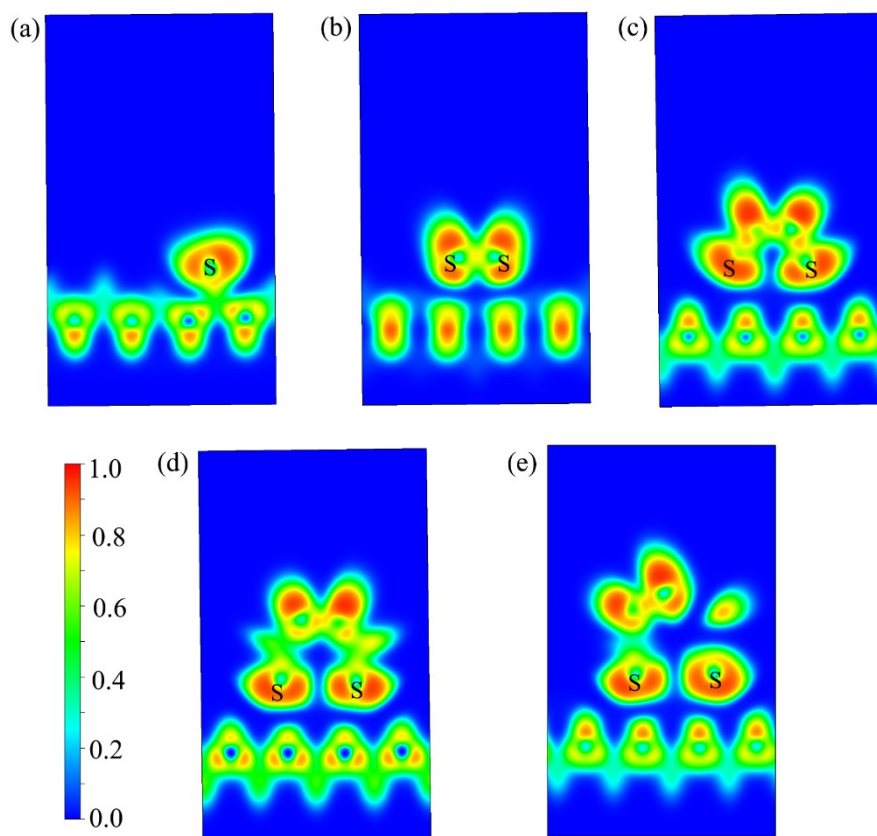

Figure S3 Sliced electron localization function of (a)  $\text{Li}_2\text{S}$ , (b)  $\text{Li}_2\text{S}_2$ , (c)  $\text{Li}_2\text{S}_4$ , (d)  $\text{Li}_2\text{S}_6$ , (e)  $\text{Li}_2\text{S}_8$  adsorbed on  $\beta_1$ -PC surfaces between the S-P and Li-P atoms.

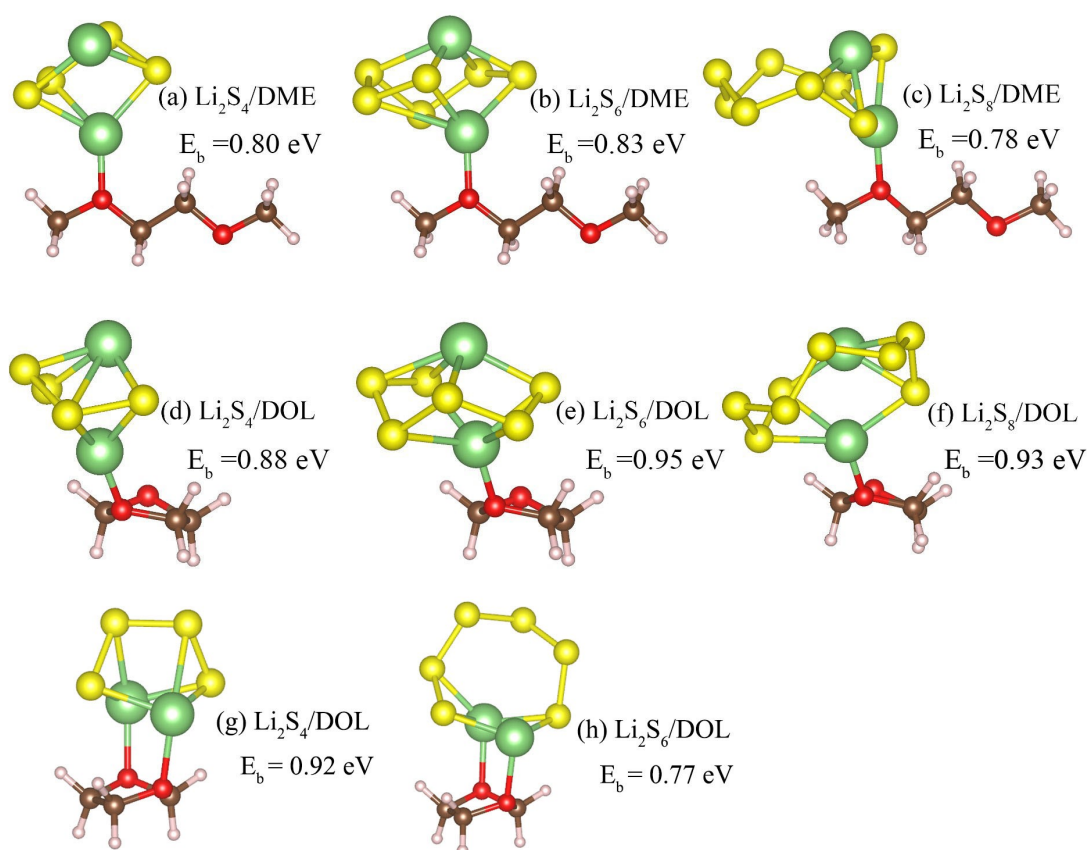

Figure S4 The structures of (a)  $\text{Li}_2\text{S}_4$ , (b)  $\text{Li}_2\text{S}_6$  and (c)  $\text{Li}_2\text{S}_8$  adsorbed on DME, (d)  $\text{Li}_2\text{S}_4$ , (e)  $\text{Li}_2\text{S}_6$  and (f)  $\text{Li}_2\text{S}_8$  adsorbed on DOL and (g)  $\text{Li}_2\text{S}_4$ , (h)  $\text{Li}_2\text{S}_6$  adsorbed on DOL through 2Li–O bonds simulated with vdW functional. The brown, red, pink, yellow and green spheres represent the C, O, H, S and Li atoms, respectively.

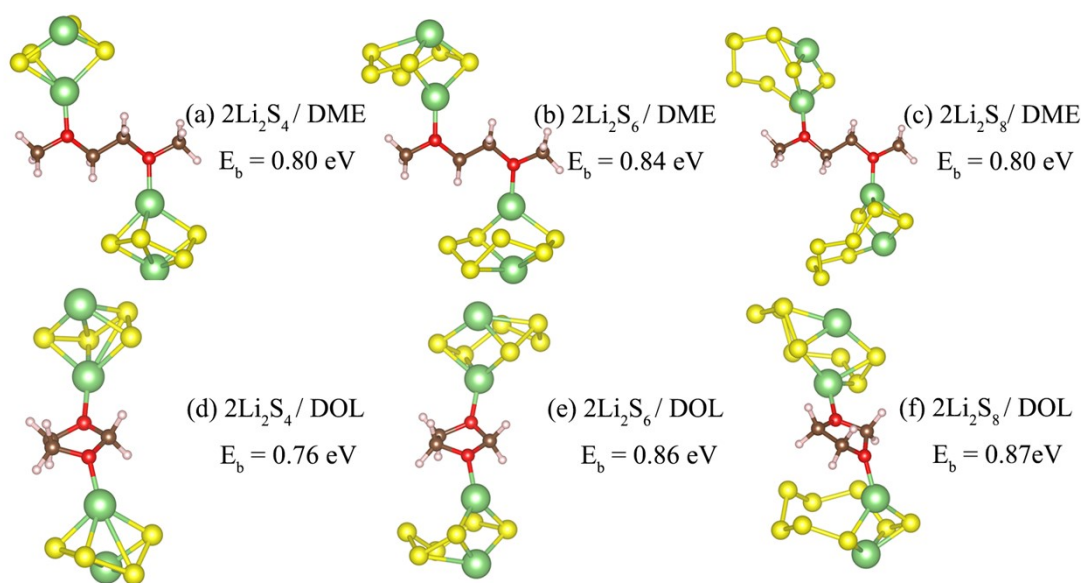

Figure S5 The structures of two (a)  $\text{Li}_2\text{S}_4$ , (b)  $\text{Li}_2\text{S}_6$  and (c)  $\text{Li}_2\text{S}_8$  molecules adsorbed on DME and two (d)  $\text{Li}_2\text{S}_4$ , (e)  $\text{Li}_2\text{S}_6$  and (f)  $\text{Li}_2\text{S}_8$  molecules adsorbed on DOL simulated with vdW functional. The brown, red, pink, yellow and green spheres represent the C, O, H, S and Li atoms, respectively.

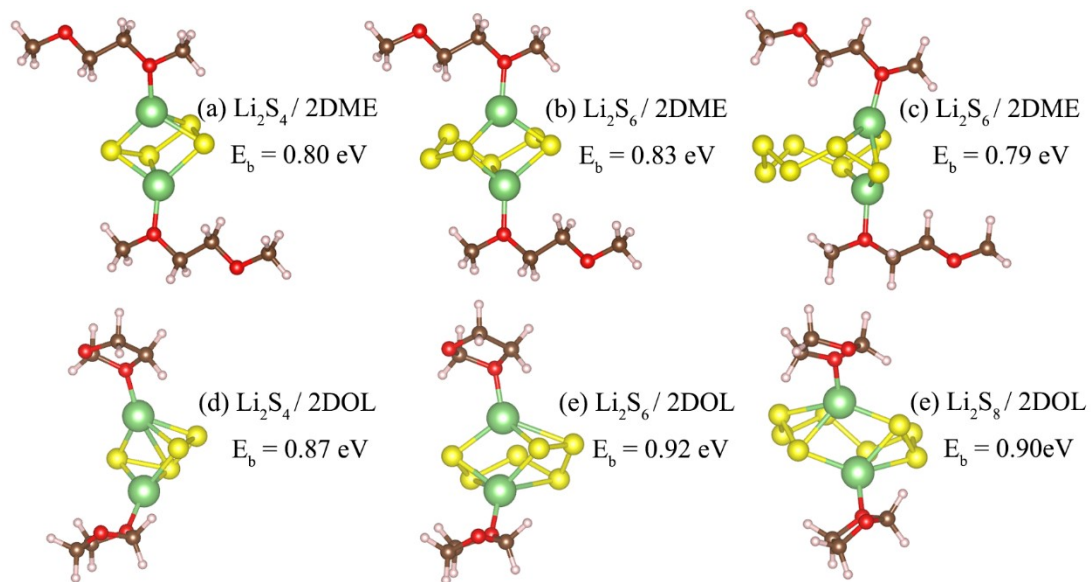

Figure S6 The structures of (a)  $\text{Li}_2\text{S}_4$ , (b)  $\text{Li}_2\text{S}_6$  and (c)  $\text{Li}_2\text{S}_8$  adsorbed on two DME molecules and (d)  $\text{Li}_2\text{S}_4$ , (e)  $\text{Li}_2\text{S}_6$  and (f)  $\text{Li}_2\text{S}_8$  adsorbed on two DOL molecules simulated with vdW functional. The brown, red, pink, yellow and green spheres represent the C, O, H, S and Li atoms, respectively.



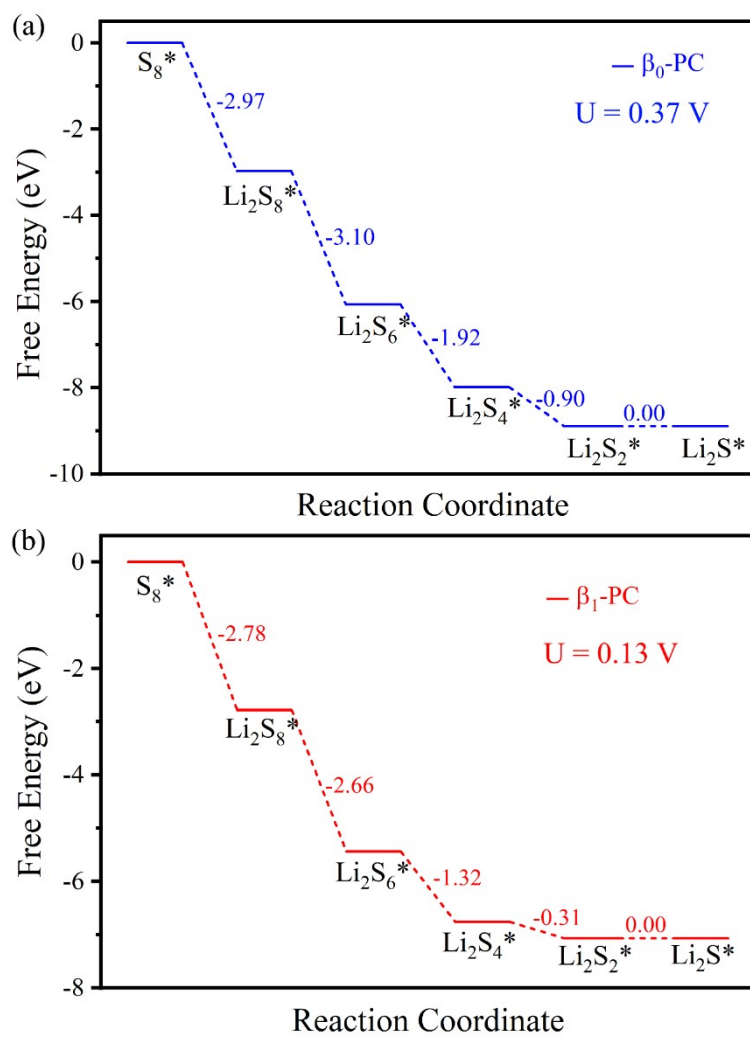

Figure S7 Calculated SRR Gibbs free energy diagram of  $\beta_0$ -PC with a potential of  $U=0.37$  V. (b) Calculated SRR Gibbs free energy diagram of  $\beta_1$ -PC with a potential of  $U=0.13$  V.

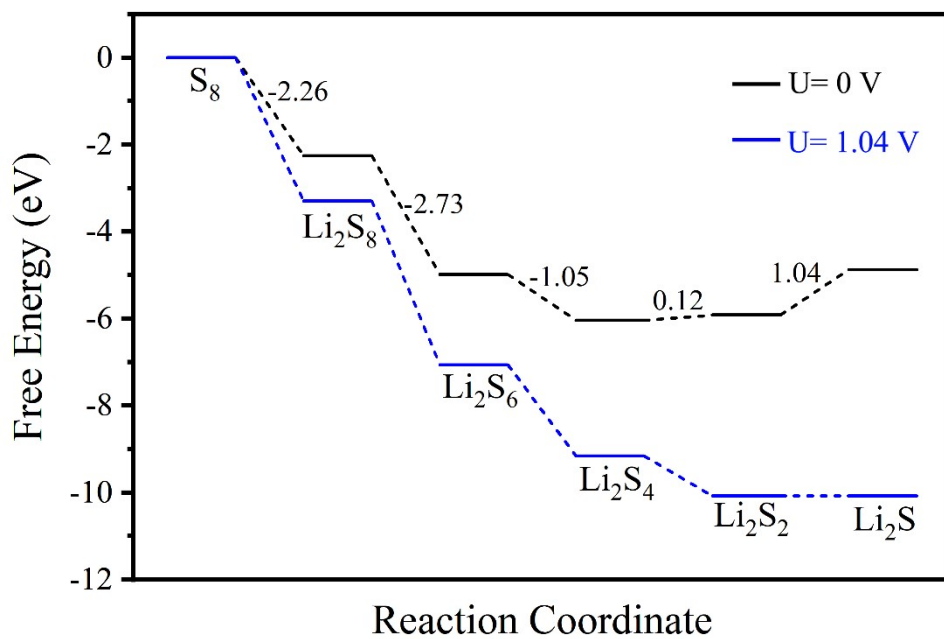

Figure S8 The Gibbs free energy diagram of sulfur reduction reaction in vacuum under potentials  $U=0$  V and  $U=1.04$  V.

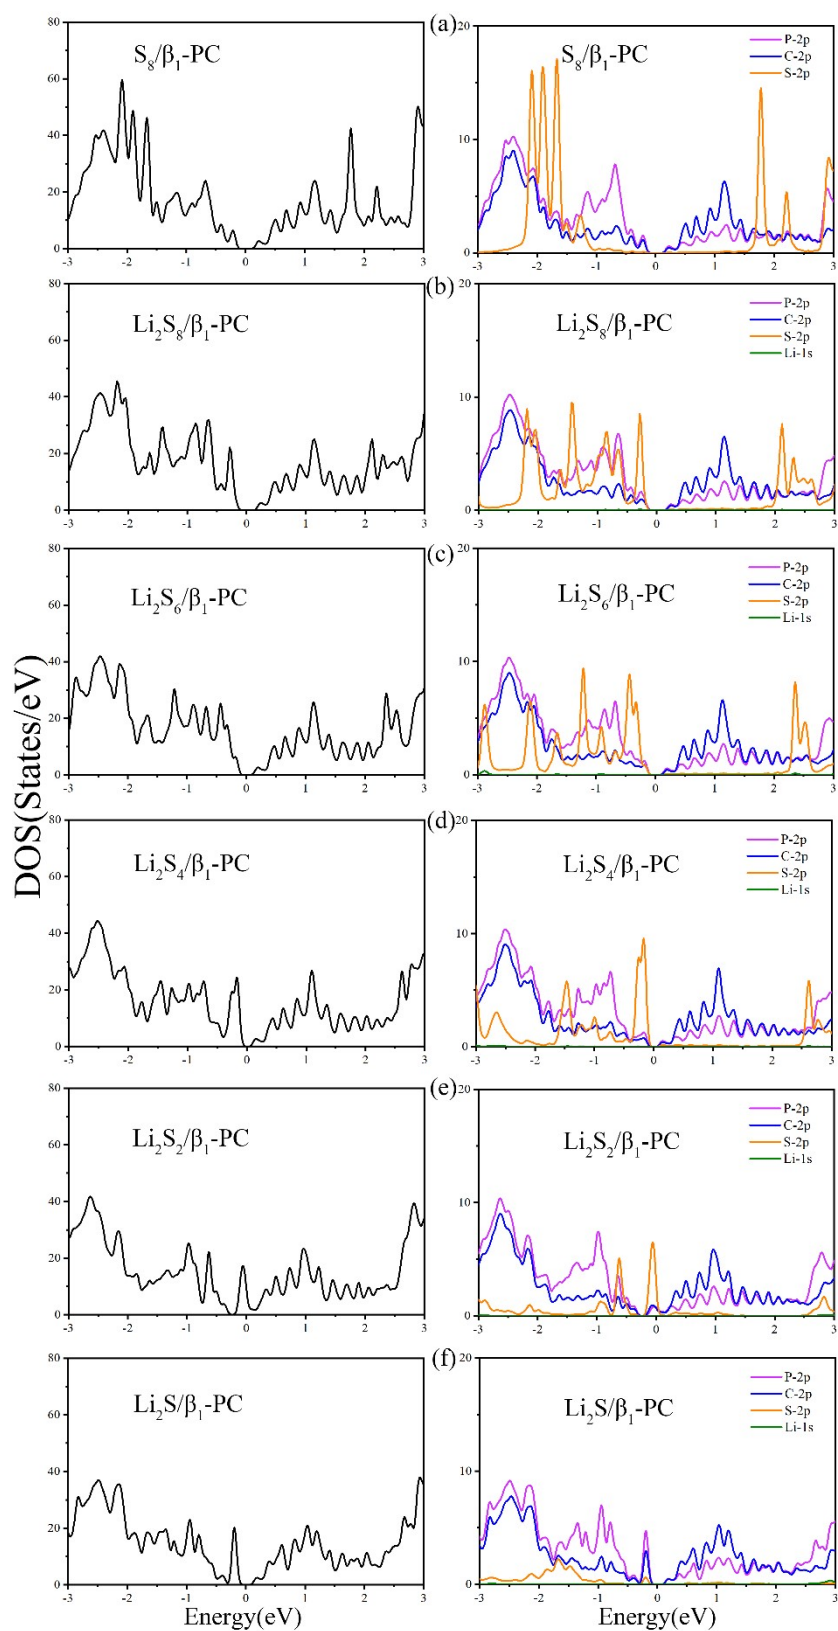

Figure S9 (Right panel) TDOSs and (left panel) PDOSs projected onto the different atomic orbitals of (a)  $S_8 @ \beta_1$ -PC and  $Li_2S_n @ \beta_1$ -PC with (b)  $n = 8$ , (c)  $n = 6$ , (d)  $n = 4$ , (e)  $n = 2$ , and (f)  $n = 1$ . The Fermi level is set to 0.

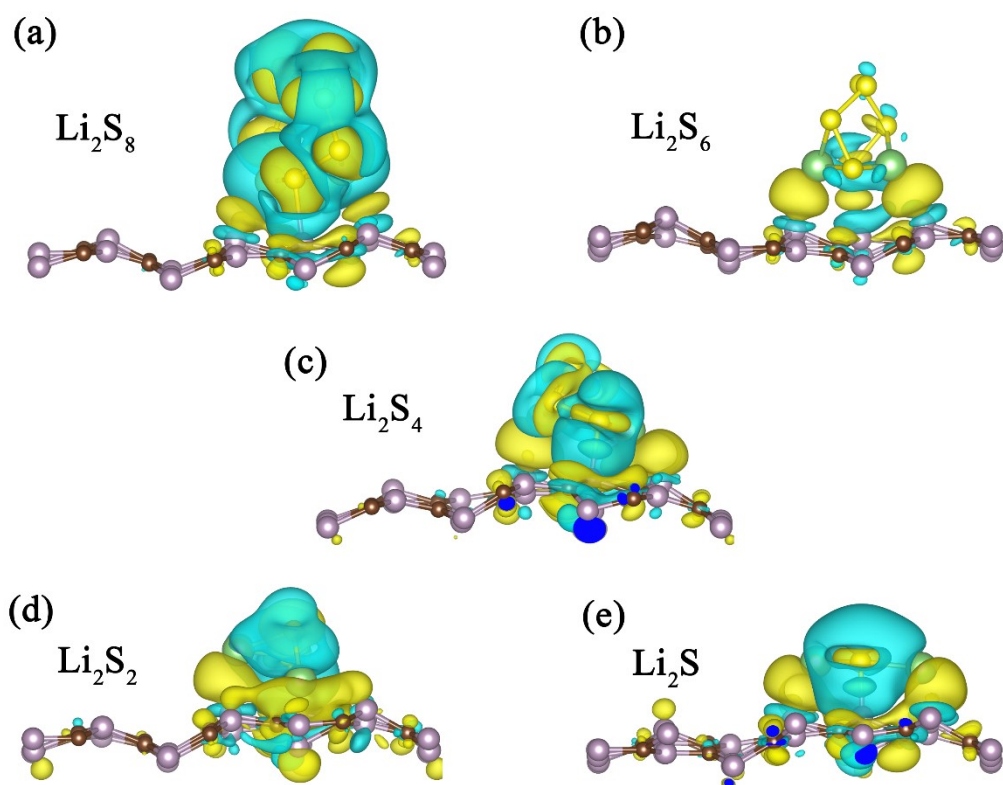

Figure S10. Differential charge density distribution for (a)  $\text{Li}_2\text{S}_8$ , (b)  $\text{Li}_2\text{S}_6$ , (c)  $\text{Li}_2\text{S}_4$ , (d)  $\text{Li}_2\text{S}_2$  (e)  $\text{Li}_2\text{S}$  molecules adsorbed on the  $\beta_0$ -PC. Yellow and blue colors indicate the electron accumulation and depletion, respectively.

## Coordinates of $\beta_0$ -PC

POSCAR of  $\beta_0$ -PC

1.0000000000000000

5.0570000000000004 0.0000000000000000 0.0000000000000000

0.0000000000000000 2.9190000381000001 0.0000000000000000

0.0000000000000000 0.0000000000000000 20.0000000000000000

P C

2 2

Direct

0.0356262804186827 0.9971171071842875 0.1518894184959692

0.5356309672806532 0.4973582542839807 0.2032574553146063

0.2093512523693093 0.4971457224172937 0.1715866483905728

0.7093615059313620 0.9974189331144387 0.1835365107988878

## Coordinates of $\beta_0$ -PC

POSCAR of  $\beta_1$ -PC

1.0000000000000000

|                    |                    |                     |
|--------------------|--------------------|---------------------|
| 4.7020000000000008 | 0.0000000000000000 | 0.0000000000000000  |
| 0.0000000000000000 | 2.9120000000000008 | 0.0000000000000000  |
| 0.0000000000000000 | 0.0000000000000000 | 20.0000000000000000 |

P C

2 2

Direct

|                    |                    |                    |
|--------------------|--------------------|--------------------|
| 0.0177654991436995 | 0.0000000000000000 | 0.9997884943248252 |
| 0.6782124076314275 | 0.0000000000000000 | 0.0852162910794760 |
| 0.2175005326161852 | 0.5000000000000000 | 0.0273980921654555 |
| 0.4785215606086837 | 0.5000000000000000 | 0.0575971224302521 |
